# Supplementary material
Source: PubMed Central journal article supplement (PMC4889517)
Supplement: NIHMS765692-supplement.pdf [file NIHMS765692-supplement.pdf]

**A**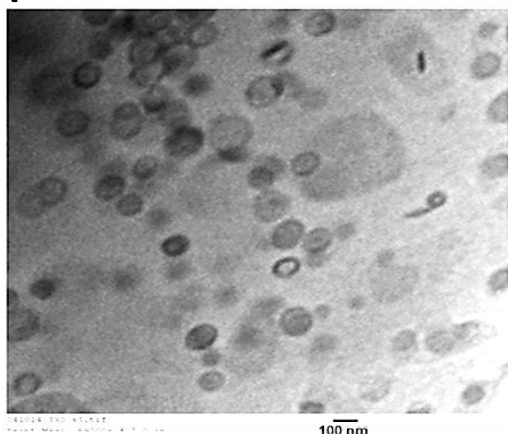**B**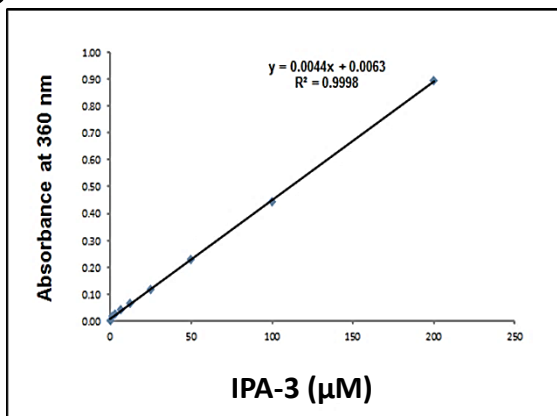

**Supplemental Figure 1: (A)** Tandem Electron Microscopy (TEM) of sterically stabilized IPA-3 Liposomes. 10  $\mu$ l of liposomal suspension were placed on a carbon-over-Pioloform-coated copper grid and let dry out overnight. Samples were imaged the next day using TEM. **(B)** Standard curve used for IPA3 quantification in SSL-IPA-3. Serial dilutions of IPA-3 stock solution were made in acidic ethanol and absorbance at 360 nm was recorded and plotted against the concentration of IPA-3. A standard curve ( $R^2 > 0.99$ ) was used to determine the concentration of IPA-3 in sterically stabilized liposomes (SSL-IPA-3).

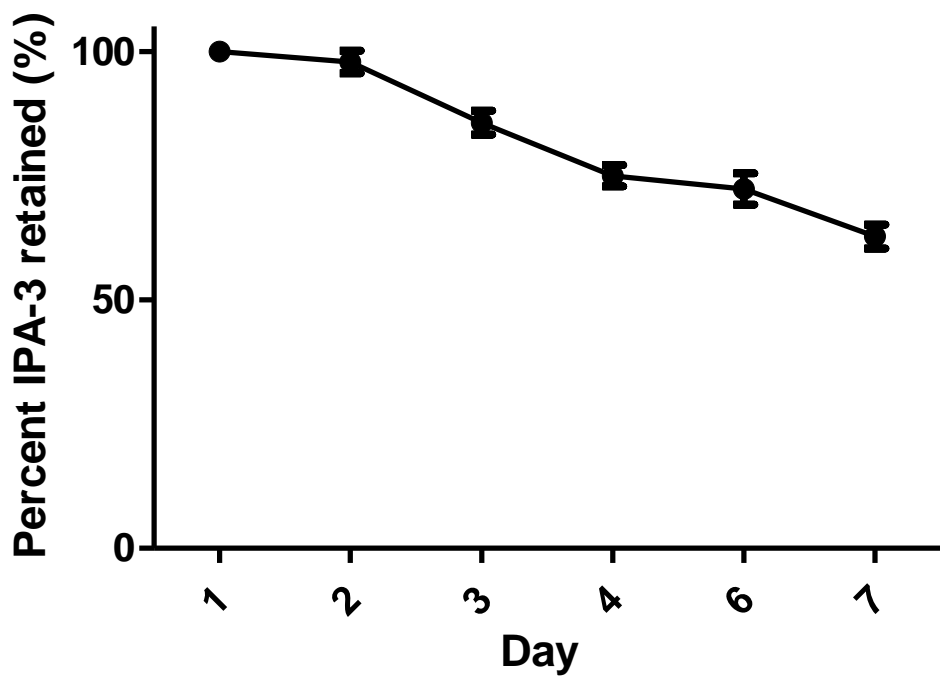

**Supplemental Figure 2:** IPA-3 in SSL are stable for 7 days following re-formulation. SSL were evaluated for their retention capacity of IPA-3 for 72 hr following reformulation. Drug leakage from liposomes was determined by removing portions of liposomes from a pool stored at pH 7.4 and 4°C at the indicated time point. After dialysis, IPA-3 encapsulated liposomes were analyzed for IPA-3 content as described in the methods. Data are presented as the mean  $\pm$  SEM of the amount of IPA-3 retained as function of time.

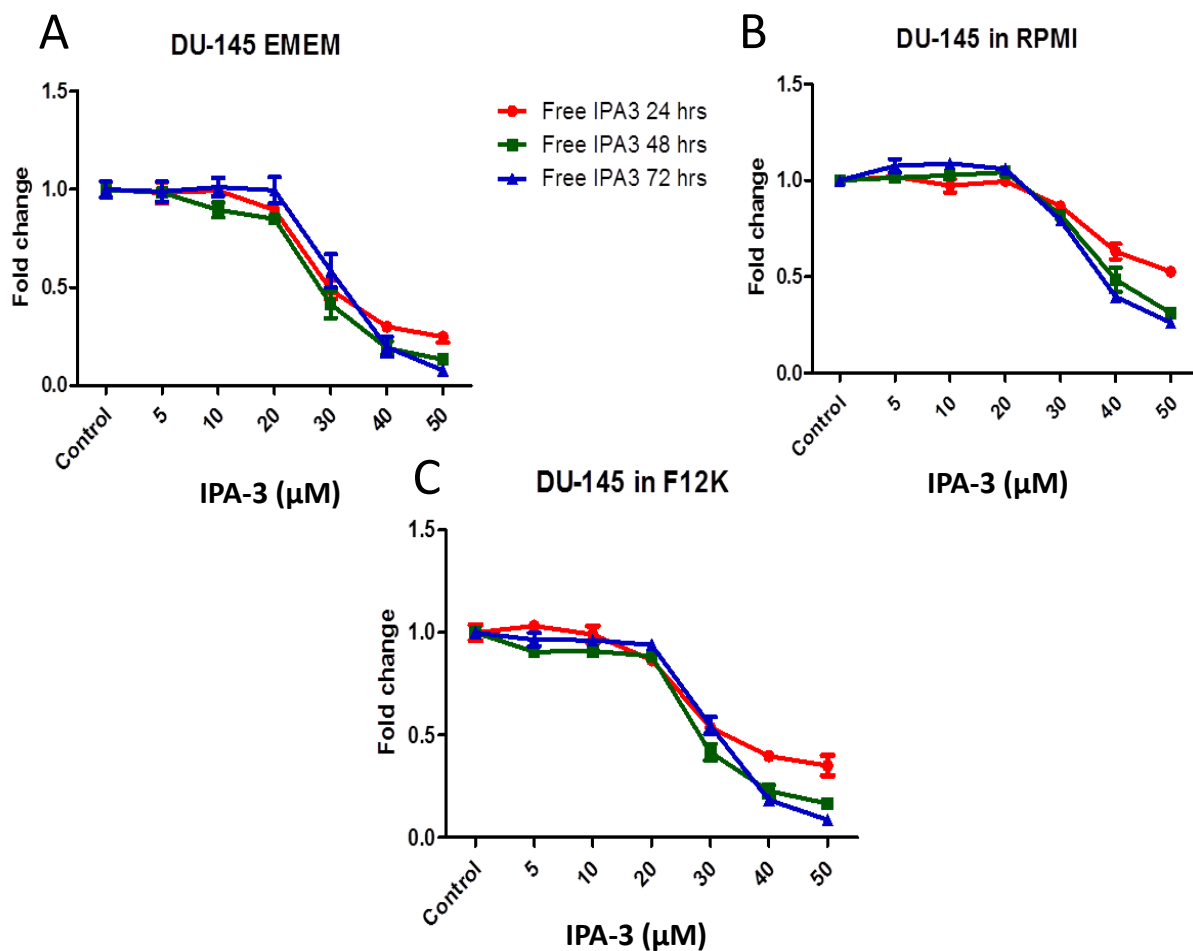

**Supplemental Figure 3.** Effect of media on IPA-3 activity in DU-145 cells. Effect of free IPA-3 on MTT staining in human prostate cancer cells (DU-145) in three different media (EMEM, RPMI, and F-12K) after 24, 48 and 72 h treatment. Data represent fold change in MTT staining as function of IPA3 concentration. Data are presented as the mean  $\pm$  SEM.
